# Supplementary material for: Overexpression of PD-L1 is an Independent Predictor for Recurrence in HCC Patients Who Receive Sorafenib Treatment After Surgical Resection
Source: PubMed Central journal article supplement (PMC8804345; doi:10.3389/fonc.2021.783335), 2022-01-18

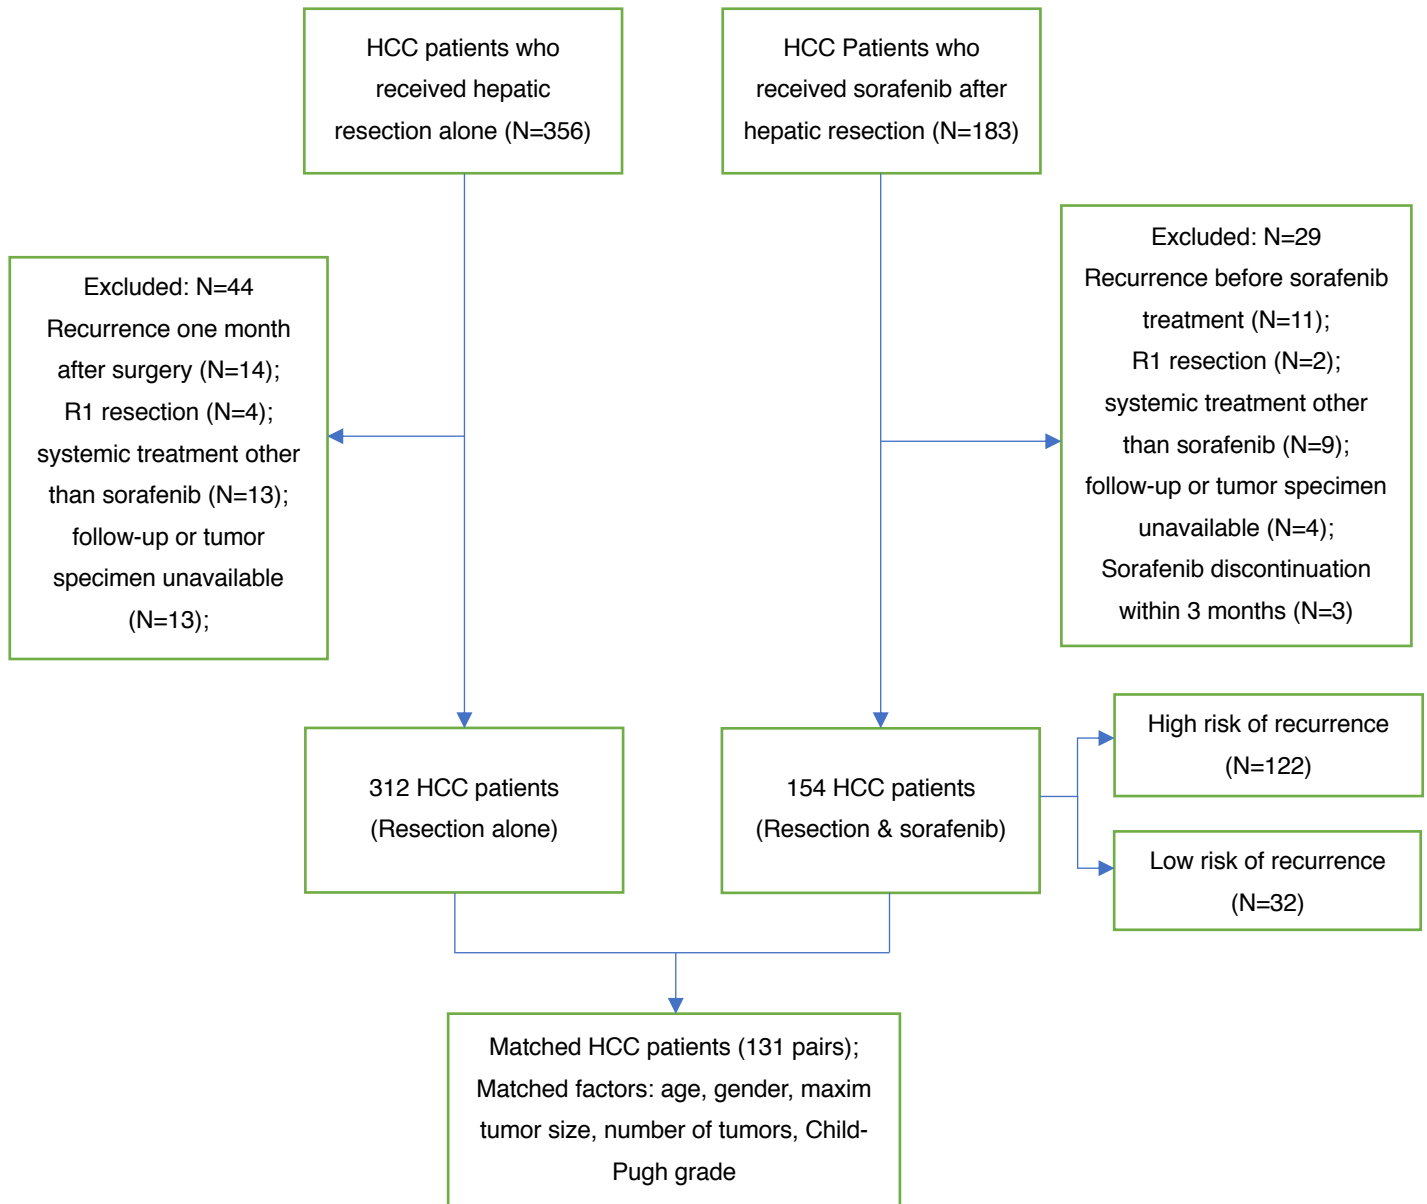

Supplement: DataSheet_1.pdf [file DataSheet_1.pdf]
